# Supplementary material for: Administration of cytokine-induced myeloid-derived suppressor cells ameliorates renal fibrosis in diabetic mice
Source: PubMed Central journal article supplement (PMC6032782; doi:10.1186/s13287-018-0915-0), 2018-07-04

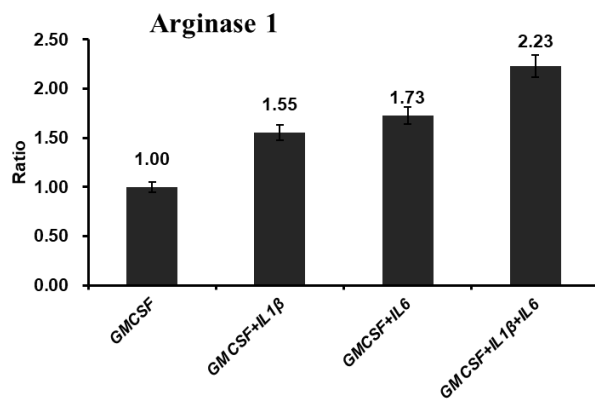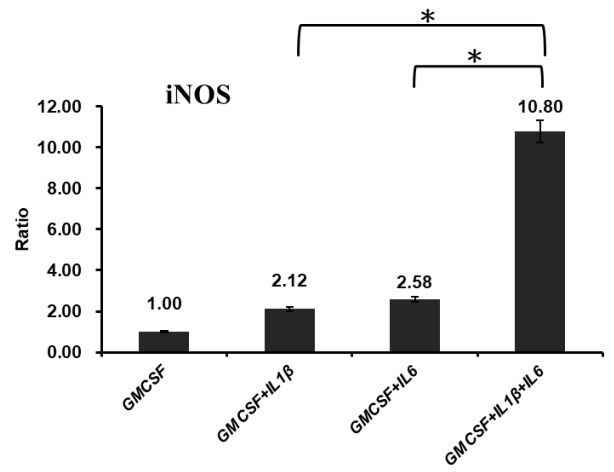

Supplement: 13287_2018_915_MOESM4_ESM.pdf [file 13287_2018_915_MOESM4_ESM.pdf]
